# Supplementary material for: Agrochemical inputs and management have a greater impact on common bean rhizobia diversity than drought
Source: Research Square preprint supplement (doi:10.21203/rs.3.rs-2864714/v1), 2023-05-05
Supplement: Supplementary file 1 [file 2f493a0e380cedd734e30035.pdf]

## **Agrochemical inputs and management have a greater impact on common bean rhizobia diversity than drought**

**Arantza del-Canto<sup>1\*</sup>, Álvaro Sanz-Saez<sup>2</sup>, Katy D. Heath<sup>3</sup>, Jonathan Heras<sup>4</sup>, Maite Lacuesta<sup>1\*</sup>**

<sup>1</sup>Department of Plant Biology and Ecology, Pharmacy Faculty, University of the Basque Country, UPV/EHU, Paseo de la Universidad nº 7, Vitoria-Gasteiz, Spain.

<sup>2</sup>Department of Crop, Soil, and Environmental Sciences, Auburn University, 201 Funchess Hall, Auburn, AL 36849, USA.

<sup>3</sup>Department of Plant Biology, University of Illinois, 505 S. Goodwin Ave, Urbana, IL 61801, USA.

<sup>4</sup>Department of Mathematics and Computer Science, University of La Rioja, Ed. CCT, C, Madre de Dios 53, E-26004 Logroño, Spain.

**\* Corresponding authors:**

Arantza del Canto Romero

[arantza.delcanto@ehu.es](mailto:arantza.delcanto@ehu.es)

Maite Lacuesta

[maite.lacuesta@ehu.es](mailto:maite.lacuesta@ehu.es)

### **Supplementary Material**

Table S.1: Number of isolated bacteria, strain diversity indices (Shanon, Margalef and Pielou) and number, structure and average stability of clusters obtained at a similarity level of 70% according to agricultural management and water availability (I, irrigated; R, rainfed).

|              | Isolated bacteria | Diversity (Shannon's index) | Richness (Margalef's index) | Evenness (Pielou's index) | Number of clusters | Cluster estructure | Cluster stability (bootstrapping) |       |
|--------------|-------------------|-----------------------------|-----------------------------|---------------------------|--------------------|--------------------|-----------------------------------|-------|
| Conventional | 127               | 4,587                       | 105,794                     | 0,983                     | 106                | 90 of 1 strain     | 0,629                             |       |
| Organic      | 193               | 5,147                       | 179,810                     | 0,991                     | 180                | 172 of 1 strain    | 0,628                             |       |
| Irrigation   | 167               | 4,996                       | 153,805                     | 0,991                     | 154                | 145 of 1 strain    | 0,633                             |       |
| Rainfed      | 153               | 4,800                       | 135,801                     | 0,987                     | 136                | 126 of 1 strain    | 0,629                             |       |
| Conventional | I                 | 71                          | 4,131                       | 64,765                    | 0,989              | 65                 | 61 of 1 strain                    | 0,639 |
|              | R                 | 56                          | 3,768                       | 45,752                    | 0,984              | 46                 | 36 of 1 strain                    | 0,629 |
| Organic      | I                 | 96                          | 4,501                       | 91,781                    | 0,995              | 92                 | 89 of 1 strain                    | 0,633 |
|              | R                 | 97                          | 4,503                       | 92,781                    | 0,993              | 93                 | 91 of 1 strain                    | 0,636 |

Table S.2: Number of isolated bacteria, strain diversity indices (Shanon, Margalef and Pielou) and number, structure and average stability of clusters obtained at a similarity level of 70% according to agricultural management (C, conventional; O, organic), water availability (I, irrigated; R, rainfed), and genotype (AA, Arrocina de Álava; AK, Amarilla de Kuartango; N, Negrita; NB, Negrita de Basaburua; RL, Riñon de Leon).

|    |             | Isolated bacteria | Diversity (Shannon's index) | Richness (Margalef's index) | Evenness (Pielou's index) | Number of clusters | Cluster estructure    | Cluster stability (bootstraping) |        |
|----|-------------|-------------------|-----------------------------|-----------------------------|---------------------------|--------------------|-----------------------|----------------------------------|--------|
| AA | C           | I                 | 10                          | 2,303                       | 9,565                     | 1                  | 10                    | All of 1 strain                  | 0,648  |
|    |             | R                 | 15                          | 2,488                       | 12,631                    | 0,97               | 13                    | 12 of 1 strain                   | 0,641  |
|    | O           | I                 | 21                          | 3,045                       | 20,671                    | 1                  | 21                    | All of 1 strain                  | 0,634  |
|    |             | R                 | 19                          | 2,944                       | 18,660                    | 1                  | 19                    | All of 1 strain                  | 0,648  |
|    | <b>Mean</b> | <b>65</b>         | <b>4,102</b>                | <b>61,760</b>               | <b>0,993</b>              | <b>60</b>          | <b>60 of 1 strain</b> | <b>0,633</b>                     |        |
| AK | C           | I                 | 10                          | 2,303                       | 9,566                     | 1                  | 10                    | All of 1 strain                  | 0,637  |
|    |             | R                 | 6                           | 1,792                       | 5,442                     | 1                  | 6                     | All of 1 strain                  | 0,671  |
|    | O           | I                 | 20                          | 2,831                       | 17,666                    | 0,979              | 18                    | 9 of 1 strain                    | 0,647  |
|    |             | R                 | 18                          | 2,890                       | 17,654                    | 1                  | 18                    | All of 1 strain                  | 0,6483 |
|    | <b>Mean</b> | <b>54</b>         | <b>3,928</b>                | <b>51,749</b>               | <b>0,994</b>              | <b>52</b>          | <b>51 of 1 strain</b> | <b>0,634</b>                     |        |
| N  | C           | I                 | 18                          | 2,700                       | 15,650                    | 0,976              | 16                    | 15 of 1 strain                   | 0,65   |
|    |             | R                 | 11                          | 2,398                       | 10,583                    | 1                  | 11                    | All of 1 strain                  | 0,65   |
|    | O           | I                 | 18                          | 2,890                       | 17,654                    | 1                  | 18                    | All of 1 strain                  | 0,638  |
|    |             | R                 | 24                          | 3,178                       | 23,685                    | 1                  | 24                    | All of 1 strain                  | 0,64   |
|    | <b>Mean</b> | <b>71</b>         | <b>4,177</b>                | <b>66,765</b>               | <b>0,993</b>              | <b>66</b>          | <b>64 of 1 strain</b> | <b>0,634</b>                     |        |
| NB | C           | I                 | 16                          | 2,773                       | 15,639                    | 1                  | 16                    | All of 1 strain                  | 0,631  |
|    |             | R                 | 9                           | 2,043                       | 7,545                     | 0,982              | 8                     | 7 of 1 strain                    | 0,676  |
|    | O           | I                 | 16                          | 2,773                       | 15,639                    | 1                  | 16                    | All of 1 strain                  | 0,646  |
|    |             | R                 | 21                          | 3,045                       | 20,672                    | 1                  | 21                    | All of 1 strain                  | 0,642  |
|    | <b>Mean</b> | <b>62</b>         | <b>4,082</b>                | <b>59,758</b>               | <b>0,996</b>              | <b>60</b>          | <b>58 of 1 strain</b> | <b>0,639</b>                     |        |
| RL | C           | I                 | 17                          | 2,639                       | 14,647                    | 0,974              | 21                    | All of 1 strain                  | 0,642  |
|    |             | R                 | 15                          | 2,610                       | 13,631                    | 0,991              | 15                    | 14 of 1 strain                   | 0,653  |
|    | O           | I                 | 21                          | 2,979                       | 19,672                    | 0,994              | 20                    | 19 of 1 strain                   | 0,64   |
|    |             | R                 | 15                          | 2,700                       | 14,631                    | 1                  | 15                    | All of 1 strain                  | 0,66   |
|    | <b>Mean</b> | <b>68</b>         | <b>4,061</b>                | <b>60,763</b>               | <b>0,988</b>              | <b>61</b>          | <b>56 of 1 strain</b> | <b>0,636</b>                     |        |
